# Supplementary material for: The relationships between water storage and biomass components in two conifer species
Source: PeerJ. 2019 Oct 14;7:e7901. doi: 10.7717/peerj.7901 (PMC6796964; doi:10.7717/peerj.7901)
Supplement: Supplemental Information 1 — The fresh weight, dry mass, water content ratio, and water storage components for Chinese fir and Korean larch are shown. [file peerj-07-7901-s001.xlsx]

## Sheet: Sheet1
No.	Species	Diameter at breast height (DBH, cm)	Tree hight (H, m)	Stem fresh weight (Stem FW, kg)	Stem dry mass (Stem DM, kg)	Stem water content ratio (Stem WCR)	Stem water storage (Stem WS, kg)	Bark fresh weight (Bark FW, kg)	Bark dry mass (Bark DM, kg)	Bark water content ratio (Bark WCR)	Bark water storage (Bark WS, kg)	Live branch fresh weight (Live branch FW, kg)	Live branch dry mass (Live branch DM, kg)	Live branch water content ratio (Live branch WCR)	Live branch water storage (Live branch WS, kg)	Leaf fresh weight (Leaf FW, kg)	Leaf dry mass (Leaf DM, kg)	Leaf water content ratio (Leaf WCR)	Leaf water storage (Leaf WS, kg)	Dead branch fresh weight (Dead branch FW, kg)	Dead branch dry mass (Dead branch DM, kg)	Dead branch water content ratio (Dead branch WCR)	Dead branch water storage (Dead branch WS, kg)	Root fresh weight (Root FW, kg)	Root dry mass (Root DM, kg)	Root water content ratio (Root WCR)	Root water storaget (Root WS, kg)
1	Chinese fir	7.3	10.7	9.37683	3.03	0.676863	6.34683	1.85126	0.74	0.599775	1.11126	0.706584	0.16	0.773888	0.546584	0.51002	0.23	0.554385	0.28002	0	0	0	0	2.08615	0.82	0.608331	1.26615
2	Chinese fir	6.5	5.8	8.44854	1.94	0.770374	6.50854	0.589413	0.27	0.539016	0.319413	2.15209	0.8	0.629422	1.35209	4.17159	1.68	0.596789	2.49159	0	0	0	0	0.996893	0.35	0.650951	0.646893
3	Chinese fir	5.9	4.6	5.66882	1.31	0.768911	4.35882	1.8206	0.85	0.532471	0.970596	1.95884	0.64	0.671743	1.31884	4.30064	1.59	0.629686	2.71064	0	0	0	0	1.34767	0.52	0.615985	0.827667
4	Chinese fir	5.1	4.1	3.43718	0.86	0.749795	2.57718	1.20363	0.38	0.684983	0.823633	1.52598	0.49	0.678354	1.03598	7.01005	2.34	0.665862	4.67005	0	0	0	0	1.47069	0.56	0.620499	0.910688
5	Chinese fir	14.9	11.5	59.787	17.43	0.708465	42.357	13.1117	4.53	0.654643	8.58172	19.6377	7.77	0.604263	11.8677	25.9272	9.98	0.615011	15.9472	2.00383	1.11	0.446335	0.89383	21.2051	7.71	0.636351	13.4951
6	Chinese fir	16.9	16.6	135.426	38.83	0.713276	96.5965	22.2421	8.49	0.618173	13.7521	14.1611	5.52	0.61	8.64106	16.1739	6.02	0.627949	10.1539	1.31715	0.93	0.293232	0.387154	24.1644	10.36	0.571228	13.8044
7	Chinese fir	18	19.4	141.574	46.64	0.67056	94.9338	15.6573	6.43	0.589144	9.22731	6.00507	2.46	0.59	3.54507	4.29354	1.54	0.641672	2.75354	0.568193	0.48	0.154725	0.0881934	15.323	5.6	0.634628	9.72302
8	Chinese fir	18.5	19.7	165.398	55.67	0.663418	109.728	15.9376	6.33	0.602862	9.60756	25.7548	7.82	0.696408	17.9348	11.3568	3.76	0.668646	7.5968	1.94762	1.13	0.4191	0.817617	19.2584	6.63	0.655795	12.6284
9	Chinese fir	24.1	22.1	325.524	111.07	0.658796	214.454	45.414	20.7	0.544217	24.714	19.0532	7.5	0.606378	11.5532	7.76314	2.99	0.614513	4.77314	1.99987	1.65	0.17484	0.349872	32.8137	13.19	0.597946	19.6237
10	Chinese fir	26.6	24	343.414	134.99	0.606917	208.424	55.1934	25.77	0.53312	29.4234	38.2611	15.25	0.6015	23.0111	16.2409	5.95	0.633679	10.2909	2.88438	2.46	0.147083	0.424379	57.3886	20.89	0.636037	36.4986
11	Chinese fir	23.3	20.5	240.157	89.88	0.625744	150.277	39.4981	18.2	0.53928	21.2981	20.6735	8.16	0.605311	12.5135	12.8761	5.07	0.606472	7.80615	24.0667	16.76	0.303556	7.30667	40.1234	18.52	0.538385	21.6034
12	Chinese fir	21.8	21.3	255.91	93.48	0.634715	162.43	30.4814	11.4	0.626064	19.0814	13.6141	5.3	0.61059	8.31406	5.7204	1.66	0.709224	4.0604	4.26079	2.52	0.408226	1.74079	74.3059	42.54	0.427512	31.7659
13	Korean larch	3.4	3.5	2.63989	0.97	0.63256	1.66989	0.585	0.2	0.661512	0.385	1.49591	0.72	0.517274	0.77591	1.01531	0.33	0.672577	0.685307	0.0131	0.01	0.231343	0.0031	0.8921	0.33	0.630915	0.5621
14	Korean larch	4.5	4.5	3.44692	1.22	0.646061	2.22692	1.05197	0.4	0.617486	0.651969	2.15188	0.83	0.613627	1.32188	2.80532	0.89	0.683019	1.91532	0.0122134	0.01	0.221343	0.00221343	1.17113	0.36	0.692614	0.811129
15	Korean larch	8.2	8.15	15.4736	7.17	0.53663	8.3036	4.63592	2.17	0.531519	2.46592	6.46334	2.94	0.545287	3.52334	7.09897	2.6	0.633786	4.49897	0.384511	0.32	0.167213	0.0645107	5.19609	2.29	0.559523	2.90609
16	Korean larch	12.2	12.4	65.023	29.66	0.543854	35.363	11.7577	5.52	0.530643	6.23771	6.13234	3.04	0.504468	3.09234	3.51364	1.23	0.650508	2.28364	5.83263	4.34	0.256025	1.49263	22.7861	10.99	0.517761	11.7961
17	Korean larch	14.6	15.5	111.692	53.3	0.522793	58.3916	14.7076	7.05	0.5207	7.65761	15.3389	7.54	0.508547	7.79886	7.90025	3.28	0.584514	4.62025	0.931836	0.79	0.151697	0.141836	36.4975	18.54	0.491987	17.9575
18	Korean larch	15.9	16.1	136.863	71.94	0.474365	64.9231	14.7965	6.92	0.532157	7.87645	20.5273	9.67	0.528811	10.8573	7.49147	2.85	0.619376	4.64147	1.89171	1.44	0.238997	0.451705	29.8752	17.13	0.426634	12.7452
19	Korean larch	16.1	16.7	126.839	70.2	0.446543	56.6392	16.4396	8.72	0.469506	7.71962	20.623	11.44	0.445221	9.18297	11.077	4.77	0.569375	6.30701	11.5397	9.2	0.202835	2.33971	25.1413	14.11	0.438745	11.0313
20	Korean larch	16.2	15.3	117.984	57.07	0.516291	60.9143	22.1429	9.33	0.57866	12.8129	22.512	8.39	0.627273	14.122	3.17838	1	0.68465	2.17838	3.80416	3.07	0.1932	0.73416	32.2786	14.84	0.540215	17.4386
21	Korean larch	19	15.8	156.378	77.97	0.5014	78.4078	19.5787	10.33	0.472274	9.2487	33.851	18.22	0.461793	15.631	20.0873	7.31	0.635954	12.7773	6.67661	5.58	0.164286	1.09661	64.1315	34.35	0.464412	29.7815
22	Korean larch	21.6	18	253.42	141.87	0.440178	111.55	33.919	19.35	0.429473	14.569	67.7306	36.97	0.454176	30.7606	34.3743	14.25	0.585415	20.1243	5.98175	5.17	0.135682	0.811747	106.641	44.79	0.58	61.8512
23	Korean larch	23.7	18.5	304.027	154.45	0.491986	149.577	34.6261	14.49	0.581588	20.1361	75.4146	35.66	0.52717	39.7546	41.1275	12.71	0.691027	28.4175	0.755	0.62	0.18	0.135	100.521	45.15	0.550839	55.3714
24	Korean larch	27.4	25.9	581.286	345.69	0.405301	235.596	71.7927	35.41	0.506765	36.3827	84.4953	42.82	0.493198	41.6753	31.0247	11.97	0.614273	19.0547	4.87664	3.63	0.255774	1.24664	140.859	77.05	0.452991	63.8091
Note: Diameter at breast height (DBH, cm), Tree hight (H, m), Fresh weigh (FW, kg) and Dry mass (DM, kg) data were measured directly, Water content ratio (WCR) and Water storage (WS, kg) data were calculated indrectly (see Manuscript).
